# Supplementary material for: Reductions in endometriosis-associated pain among women treated with elagolix are consistent across a range of baseline characteristics reflective of real-world patients
Source: PubMed Central journal article supplement (PMC8210385; doi:10.1186/s12905-021-01385-3), 2021-06-16

**Reductions in endometriosis-associated pain among women treated with elagolix are consistent across a range of baseline characteristics reflective of real-world patients**

Mauricio S. Abrao<sup>1,2</sup>, Eric Surrey<sup>3</sup>, Keith Gordon<sup>4</sup>, Michael C. Snabes<sup>4</sup>, Hui Wang<sup>4</sup>, Horia Ijacu<sup>4</sup>, and Hugh S. Taylor<sup>5</sup>

<sup>1</sup>Endometriosis Section, Gynecologic Division. Hospital das Clinicas HCFMUSP, Faculdade de Medicina, Universidade de Sao Paulo, São Paulo, São Paulo, Brazil

<sup>2</sup>Gynecologic Division, Hospital BP-A Beneficencia Portuguesa de Sao Paulo, São Paulo, São Paulo, Brazil

<sup>3</sup>Colorado Center for Reproductive Medicine, Lone Tree, CO, USA

<sup>4</sup>Departments of Clinical Development, Medical Affairs, and Statistics, AbbVie Inc., North Chicago, IL, USA

<sup>5</sup>Department of Obstetrics, Gynecology and Reproductive Sciences, Yale School of Medicine, New Haven, CT, USA

## SUPPLEMENTAL MATERIALS

## SUPPLEMENTAL TABLES

Supplemental Table 1. Endometriosis Health Profile-30 at month 3 – pain

| Variable                                                                                                                    | N   | Least squares means (SE) | Difference of least squares means (SE) | 95% CI           | p value <sup>b</sup> | Treatment by subgroup p value <sup>c</sup> | Subgroup p value <sup>c</sup> |
|-----------------------------------------------------------------------------------------------------------------------------|-----|--------------------------|----------------------------------------|------------------|----------------------|--------------------------------------------|-------------------------------|
| Pain <sup>a</sup>                                                                                                           |     |                          |                                        |                  |                      |                                            |                               |
| Age group (< 25 years, 2 to 35 years, > 35 years)                                                                           |     |                          |                                        |                  |                      | 0.036*                                     | 0.069                         |
| Placebo                                                                                                                     | 616 | -18.47 (0.958)           |                                        |                  |                      |                                            |                               |
| Elagolix 150 mg QD                                                                                                          | 420 | -25.84 (1.134)           | -7.37 (1.48)                           | (-10.28, -4.46)  | <0.001***            |                                            |                               |
| Elagolix 200 mg BID                                                                                                         | 397 | -35.59 (1.139)           | -17.12 (1.49)                          | (-20.04, -14.20) | <0.001***            |                                            |                               |
| BMI group (normal = < 25 kg/m <sup>2</sup> , overweight = 25 to ≤ 29.9 kg/m <sup>2</sup> , obese = ≥ 30 kg/m <sup>2</sup> ) |     |                          |                                        |                  |                      | 0.140                                      | 0.228                         |
| Placebo                                                                                                                     | 614 | -18.28 (0.790)           |                                        |                  |                      |                                            |                               |
| Elagolix 150 mg QD                                                                                                          | 419 | -26.81 (0.948)           | -8.53 (1.23)                           | (-10.95, -6.11)  | <0.001***            |                                            |                               |
| Elagolix 200 mg BID                                                                                                         | 394 | -35.69 (0.991)           | -17.42 (1.27)                          | (-19.90, -14.93) | <0.001***            |                                            |                               |
| Race group (White, Black, other)                                                                                            |     |                          |                                        |                  |                      | 0.236                                      | 0.958                         |
| Placebo                                                                                                                     | 616 | -16.26 (1.711)           |                                        |                  |                      |                                            |                               |
| Elagolix 150 mg QD                                                                                                          | 420 | -27.90 (2.162)           | -11.64 (2.76)                          | (-17.05, -6.24)  | <0.001***            |                                            |                               |
| Elagolix 200 mg BID                                                                                                         | 397 | -35.75 (2.303)           | -19.49 (2.86)                          | (-25.11, -13.87) | <0.001***            |                                            |                               |
| Ethnic group (Hispanic or Latino, other)                                                                                    |     |                          |                                        |                  |                      | 0.190                                      | 0.004**                       |
| Placebo                                                                                                                     | 616 | -17.85 (1.096)           |                                        |                  |                      |                                            |                               |
| Elagolix 150 mg QD                                                                                                          | 420 | -24.02 (1.327)           | -6.17 (1.72)                           | (-9.54, -2.79)   | <0.001***            |                                            |                               |
| Elagolix 200 mg BID                                                                                                         | 397 | -34.65 (1.342)           | -16.80 (1.73)                          | (-20.20, -13.40) | <0.001***            |                                            |                               |
| Baseline dysmenorrhea (< median = 2.17, ≥ median = 2.17)                                                                    |     |                          |                                        |                  |                      | 0.047*                                     | <0.001***                     |
| Placebo                                                                                                                     | 616 | -18.49 (0.774)           |                                        |                  |                      |                                            |                               |
| Elagolix 150 mg QD                                                                                                          | 420 | -26.87 (0.937)           | -8.39 (1.22)                           | (-10.77, -6.00)  | <0.001***            |                                            |                               |
| Elagolix 200 mg BID                                                                                                         | 397 | -35.57 (0.965)           | -17.08 (1.24)                          | (-19.51, -14.66) | <0.001***            |                                            |                               |
| Baseline NMPP (< median = 1.54, ≥ median = 1.54)                                                                            |     |                          |                                        |                  |                      | 0.011*                                     | <0.001***                     |
| Placebo                                                                                                                     | 616 | -18.46 (0.767)           |                                        |                  |                      |                                            |                               |

|                                                                          |     |                |               |                  |           |       |           |
|--------------------------------------------------------------------------|-----|----------------|---------------|------------------|-----------|-------|-----------|
| Elagolix 150 mg QD                                                       | 420 | -27.02 (0.929) | -8.56 (1.20)  | (-10.92, -6.20)  | <0.001*** |       |           |
| Elagolix 200 mg BID                                                      | 397 | -35.28 (0.958) | -16.81 (1.23) | (-19.22, -14.40) | <0.001*** |       |           |
| Baseline dyspareunia (< median = 1.40, ≥ median = 1.40)                  |     |                |               |                  |           | 0.676 | 0.004**   |
| Placebo                                                                  | 504 | -18.83 (0.860) |               |                  |           |       |           |
| Elagolix 150 mg QD                                                       | 349 | -27.10 (1.034) | -8.27 (1.35)  | (-10.91, -5.63)  | <0.001*** |       |           |
| Elagolix 200 mg BID                                                      | 320 | -36.67 (1.080) | -17.84 (1.38) | (-20.55, -15.14) | <0.001*** |       |           |
| Time since endometriosis diagnosis (< 2 years, 2 to <5 years, ≥ 5 years) |     |                |               |                  |           | 0.883 | 0.035*    |
| Placebo                                                                  | 616 | -18.54 (0.782) |               |                  |           |       |           |
| Elagolix 150 mg QD                                                       | 420 | -27.07 (0.958) | -8.53 (1.24)  | (-10.95, -6.10)  | <0.001*** |       |           |
| Elagolix 200 mg BID                                                      | 396 | -35.54 (0.976) | -16.99 (1.25) | (-19.45, -14.54) | <0.001*** |       |           |
| Baseline analgesic use (none, opioids, NSAID, both)                      |     |                |               |                  |           | 0.065 | <0.001*** |
| Placebo                                                                  | 616 | -18.13 (0.950) |               |                  |           |       |           |
| Elagolix 150 mg QD                                                       | 420 | -26.50 (1.026) | -8.37 (1.40)  | (-11.12, -5.63)  | <0.001*** |       |           |
| Elagolix 200 mg BID                                                      | 397 | -36.48 (1.190) | -18.35 (1.52) | (-21.33, -15.36) | <0.001*** |       |           |
| Previous GnRH therapy (yes, no)                                          |     |                |               |                  |           | 0.529 | 0.089     |
| Placebo                                                                  | 616 | -17.68 (0.898) |               |                  |           |       |           |
| Elagolix 150 mg QD                                                       | 420 | -26.16 (1.073) | -8.47 (1.40)  | (-11.22, -5.73)  | <0.001*** |       |           |
| Elagolix 200 mg BID                                                      | 397 | -35.56 (1.093) | -17.88 (1.41) | (-20.65, -15.10) | <0.001*** |       |           |
| Entered washout (yes, no)                                                |     |                |               |                  |           | 0.527 | 0.677     |
| Placebo                                                                  | 616 | -18.20 (0.884) |               |                  |           |       |           |
| Elagolix 150 mg QD                                                       | 420 | -26.33 (1.116) | -8.13 (1.42)  | (-10.92, -5.34)  | <0.001*** |       |           |
| Elagolix 200 mg BID                                                      | 397 | -35.96 (1.119) | -17.77 (1.43) | (-20.57, -14.97) | <0.001*** |       |           |
| History of pregnancy at baseline (yes, no)                               |     |                |               |                  |           | 0.504 | 0.783     |
| Placebo                                                                  | 616 | -18.61 (0.789) |               |                  |           |       |           |
| Elagolix 150 mg QD                                                       | 420 | -26.87 (0.966) | -8.27 (1.25)  | (-10.71, -5.82)  | <0.001*** |       |           |
| Elagolix 200 mg BID                                                      | 397 | -35.50 (0.981) | -16.89 (1.26) | (-19.36, -14.42) | <0.001*** |       |           |

---

<sup>a</sup>Each dimension for the core and modular questionnaire is calculated on a scale from 0 = best possible health status to 100 = worst possible health status.

<sup>b</sup>*p* value for test of difference between each elagolix dose group and placebo at each post-baseline time point is from an ANCOVA model with treatment as the main effect, baseline value, subgroup and treatment × subgroup as covariates.

<sup>c</sup>*p* values are obtained from an ANCOVA model: change from baseline = treatment + baseline value + subgroup + treatment × subgroup.

\**p*<0.05. \*\**p*<0.01. \*\*\**p*<0.001.

ANCOVA analysis of covariance; *BID* twice daily; *BMI* body mass index; *GnRH* gonadotropin-releasing hormone; *NMPP* non-menstrual pelvic pain; *NSAID* non-steroidal anti-inflammatory drug; *QD* once daily.

Supplemental Table 2. Endometriosis Health Profile-30 at month 3 – control and powerlessness

| Variable                                                                                                                    | N   | Least squares means (SE) | Difference of least squares means (SE) | 95% CI           | p value <sup>b</sup> | Treatment by subgroup p value <sup>c</sup> | Subgroup p value <sup>c</sup> |
|-----------------------------------------------------------------------------------------------------------------------------|-----|--------------------------|----------------------------------------|------------------|----------------------|--------------------------------------------|-------------------------------|
| <b>Control and Powerlessness<sup>a</sup></b>                                                                                |     |                          |                                        |                  |                      |                                            |                               |
| Age group (< 25 years, 25 to 35 years, > 35 years)                                                                          |     |                          |                                        |                  |                      | 0.353                                      | 0.640                         |
| Placebo                                                                                                                     | 626 | -24.92 (1.141)           |                                        |                  |                      |                                            |                               |
| Elagolix 150 mg QD                                                                                                          | 420 | -32.06 (1.379)           | -7.14 (1.79)                           | (-10.65, -3.63)  | <0.001***            |                                            |                               |
| Elagolix 200 mg BID                                                                                                         | 401 | -42.83 (1.362)           | -17.91 (1.78)                          | (-21.40, -14.43) | <0.001***            |                                            |                               |
| BMI group (normal = < 25 kg/m <sup>2</sup> , overweight = 25 to ≤ 29.9 kg/m <sup>2</sup> , obese = ≥ 30 kg/m <sup>2</sup> ) |     |                          |                                        |                  |                      | 0.300                                      | 0.399                         |
| Placebo                                                                                                                     | 624 | -24.76 (0.946)           |                                        |                  |                      |                                            |                               |
| Elagolix 150 mg QD                                                                                                          | 419 | -32.84 (1.145)           | -8.08 (1.49)                           | (-11.00, -5.17)  | <0.001***            |                                            |                               |
| Elagolix 200 mg BID                                                                                                         | 398 | -42.42 (1.190)           | -17.66 (1.52)                          | (-20.64, -14.68) | <0.001***            |                                            |                               |
| Race group (White, Black, other)                                                                                            |     |                          |                                        |                  |                      | 0.241                                      | 0.908                         |
| Placebo                                                                                                                     | 626 | -22.20 (2.048)           |                                        |                  |                      |                                            |                               |
| Elagolix 150 mg QD                                                                                                          | 420 | -35.32 (2.606)           | -13.12 (3.31)                          | (-19.62, -6.62)  | <0.001***            |                                            |                               |
| Elagolix 200 mg BID                                                                                                         | 401 | -43.66 (2.776)           | -21.46 (3.45)                          | (-28.22, -14.70) | <0.001***            |                                            |                               |
| Ethnic group (Hispanic or Latino, other)                                                                                    |     |                          |                                        |                  |                      | 0.025*                                     | 0.067                         |
| Placebo                                                                                                                     | 626 | -25.51 (1.308)           |                                        |                  |                      |                                            |                               |
| Elagolix 150 mg QD                                                                                                          | 420 | -29.54 (1.589)           | -4.03 (2.06)                           | (-8.07, 0.01)    | 0.050*               |                                            |                               |
| Elagolix 200 mg BID                                                                                                         | 401 | -41.55 (1.618)           | -16.04 (2.08)                          | (-20.12, -11.96) | <0.001***            |                                            |                               |
| Baseline dysmenorrhea (< median = 2.17, ≥ median = 2.17)                                                                    |     |                          |                                        |                  |                      | 0.040*                                     | <0.001***                     |
| Placebo                                                                                                                     | 626 | -24.87 (0.926)           |                                        |                  |                      |                                            |                               |
| Elagolix 150 mg QD                                                                                                          | 420 | -32.88 (1.131)           | -8.02 (1.46)                           | (-10.88, -5.15)  | <0.001***            |                                            |                               |
| Elagolix 200 mg BID                                                                                                         | 401 | -42.25 (1.158)           | -17.38 (1.48)                          | (-20.29, -14.47) | <0.001***            |                                            |                               |
| Baseline NMPP (< median = 1.54, ≥ median = 1.54)                                                                            |     |                          |                                        |                  |                      | 0.126                                      | <0.001***                     |
| Placebo                                                                                                                     | 626 | -24.86 (0.925)           |                                        |                  |                      |                                            |                               |
| Elagolix 150 mg QD                                                                                                          | 420 | -32.97 (1.130)           | -8.12 (1.46)                           | (-10.98, -5.25)  | <0.001***            |                                            |                               |
| Elagolix 200 mg BID                                                                                                         | 401 | -42.10 (1.159)           | -17.24 (1.48)                          | (-20.15, -14.33) | <0.001***            |                                            |                               |
| Baseline dyspareunia (< median = 1.40, ≥ median = 1.40)                                                                     |     |                          |                                        |                  |                      | 0.455                                      | 0.113                         |
| Placebo                                                                                                                     | 511 | -25.45 (1.033)           |                                        |                  |                      |                                            |                               |

|                                                                           |     |                |               |                  |           |       |         |
|---------------------------------------------------------------------------|-----|----------------|---------------|------------------|-----------|-------|---------|
| Elagolix 150 mg QD                                                        | 348 | -33.08 (1.252) | -7.63 (1.62)  | (-10.82, -4.45)  | <0.001*** |       |         |
| Elagolix 200 mg BID                                                       | 325 | -43.69 (1.295) | -18.24 (1.66) | (-21.49, -14.99) | <0.001*** |       |         |
| Time since endometriosis diagnosis (< 2 years, 2 to < 5 years, ≥ 5 years) |     |                |               |                  |           | 0.536 | 0.078   |
| Placebo                                                                   | 626 | -24.91 (0.934) |               |                  |           |       |         |
| Elagolix 150 mg QD                                                        | 420 | -33.28 (1.154) | -8.37 (1.49)  | (-11.28, -5.46)  | <0.001*** |       |         |
| Elagolix 200 mg BID                                                       | 400 | -42.23 (1.170) | -17.32 (1.50) | (-20.26, -14.38) | <0.001*** |       |         |
| Baseline analgesic use (none, opioids, NSAID, both)                       |     |                |               |                  |           | 0.124 | 0.003** |
| Placebo                                                                   | 626 | -24.96 (1.138) |               |                  |           |       |         |
| Elagolix 150 mg QD                                                        | 420 | -32.42 (1.249) | -7.46 (1.69)  | (-10.78, -4.14)  | <0.001*** |       |         |
| Elagolix 200 mg BID                                                       | 401 | -43.57 (1.439) | -18.61 (1.83) | (-22.21, -15.02) | <0.001*** |       |         |
| Previous GnRH therapy (yes, no)                                           |     |                |               |                  |           | 0.086 | 0.612   |
| Placebo                                                                   | 626 | -23.86 (1.070) |               |                  |           |       |         |
| Elagolix 150 mg QD                                                        | 420 | -32.44 (1.298) | -8.57 (1.68)  | (-11.87, -5.28)  | <0.001*** |       |         |
| Elagolix 200 mg BID                                                       | 401 | -43.07 (1.311) | -19.21 (1.69) | (-22.52, -15.89) | <0.001*** |       |         |
| Entered washout (yes, no)                                                 |     |                |               |                  |           | 0.597 | 0.430   |
| Placebo                                                                   | 626 | -24.65 (1.054) |               |                  |           |       |         |
| Elagolix 150 mg QD                                                        | 420 | -31.96 (1.346) | -7.31 (1.71)  | (-10.67, -3.96)  | <0.001*** |       |         |
| Elagolix 200 mg BID                                                       | 401 | -42.44 (1.342) | -17.79 (1.71) | (-21.14, -14.44) | <0.001*** |       |         |
| History of pregnancy at baseline (yes, no)                                |     |                |               |                  |           | 0.135 | 0.140   |
| Placebo                                                                   | 626 | -24.90 (0.940) |               |                  |           |       |         |
| Elagolix 150 mg QD                                                        | 420 | -32.72 (1.161) | -7.82 (1.49)  | (-10.75, -4.89)  | <0.001*** |       |         |
| Elagolix 200 mg BID                                                       | 401 | -41.90 (1.175) | -16.99 (1.50) | (-19.95, -14.04) | <0.001*** |       |         |

<sup>a</sup>Each dimension for the core and modular questionnaire is calculated on a scale from 0 = best possible health status to 100 = worst possible health status.

<sup>b</sup>*p* value for test of difference between each elagolix dose group and placebo at each post-baseline time point is from an ANCOVA model with treatment as the main effect, baseline value, subgroup, and treatment × subgroup as covariates.

<sup>c</sup>*p* values are obtained from an ANCOVA model: change from baseline = treatment + baseline value + subgroup + treatment × subgroup.

\**p*<0.05. \*\**p*<0.01. \*\*\**p*<0.001.

ANCOVA analysis of covariance; *BID* twice daily; *BMI* body mass index; *GnRH* gonadotropin-releasing hormone; *NMPP* non-menstrual pelvic pain; *NSAID* non-steroidal anti-inflammatory drug; *QD* once daily.

**Supplemental Table 3. Endometriosis Health Profile-30 at month 3 – emotional well-being**

| Variable                                                                                                                    | N   | Least squares means (SE) | Difference of least squares means (SE) | 95% CI          | p value <sup>b</sup> | Treatment by subgroup p value <sup>c</sup> | Subgroup p value <sup>c</sup> |
|-----------------------------------------------------------------------------------------------------------------------------|-----|--------------------------|----------------------------------------|-----------------|----------------------|--------------------------------------------|-------------------------------|
| <b>Emotional Well-being<sup>a</sup></b>                                                                                     |     |                          |                                        |                 |                      |                                            |                               |
| Age group (< 25 years, 25 to 35 years, > 35 years)                                                                          |     |                          |                                        |                 |                      | 0.502                                      | 0.221                         |
| Placebo                                                                                                                     | 627 | -13.43 (0.920)           |                                        |                 |                      |                                            |                               |
| Elagolix 150 mg QD                                                                                                          | 418 | -17.30 (1.107)           | -3.87 (1.44)                           | (-6.69, -1.05)  | 0.007**              |                                            |                               |
| Elagolix 200 mg BID                                                                                                         | 396 | -20.76 (1.118)           | -7.33 (1.45)                           | (-10.17, -4.49) | <0.001***            |                                            |                               |
| BMI group (normal = < 25 kg/m <sup>2</sup> , overweight = 25 to ≤ 29.9 kg/m <sup>2</sup> , obese = ≥ 30 kg/m <sup>2</sup> ) |     |                          |                                        |                 |                      | 0.361                                      | 0.936                         |
| Placebo                                                                                                                     | 625 | -13.59 (0.761)           |                                        |                 |                      |                                            |                               |
| Elagolix 150 mg QD                                                                                                          | 417 | -17.81 (0.925)           | -4.22 (1.20)                           | (-6.57, -1.87)  | <0.001***            |                                            |                               |
| Elagolix 200 mg BID                                                                                                         | 393 | -21.26 (0.964)           | -7.66 (1.23)                           | (-10.07, -5.25) | <0.001***            |                                            |                               |
| Race group (White, Black, other)                                                                                            |     |                          |                                        |                 |                      | 0.324                                      | 0.708                         |
| Placebo                                                                                                                     | 627 | -12.75 (1.681)           |                                        |                 |                      |                                            |                               |
| Elagolix 150 mg QD                                                                                                          | 418 | -18.92 (2.103)           | -6.18 (2.69)                           | (-11.46, -0.90) | 0.022*               |                                            |                               |
| Elagolix 200 mg BID                                                                                                         | 396 | -22.13 (2.232)           | -9.38 (2.79)                           | (-14.86, -3.90) | <0.001***            |                                            |                               |
| Ethnic group (Hispanic or Latino, other)                                                                                    |     |                          |                                        |                 |                      | 0.542                                      | 0.099                         |
| Placebo                                                                                                                     | 627 | -13.21 (1.052)           |                                        |                 |                      |                                            |                               |
| Elagolix 150 mg QD                                                                                                          | 418 | -16.15 (1.286)           | -2.94 (1.66)                           | (-6.20, 0.32)   | 0.077                |                                            |                               |
| Elagolix 200 mg BID                                                                                                         | 396 | -20.79 (1.29)            | -7.58 (1.67)                           | (-10.85, -4.31) | <0.001***            |                                            |                               |
| Baseline dysmenorrhea (< median = 2.17, ≥ median = 2.17)                                                                    |     |                          |                                        |                 |                      | 0.436                                      | <0.001***                     |
| Placebo                                                                                                                     | 627 | -13.69 (0.749)           |                                        |                 |                      |                                            |                               |
| Elagolix 150 mg QD                                                                                                          | 418 | -17.81 (0.917)           | -4.12 (1.18)                           | (-6.44, -1.80)  | <0.001***            |                                            |                               |
| Elagolix 200 mg BID                                                                                                         | 396 | -21.10 (0.944)           | -7.41 (1.20)                           | (-9.77, -5.04)  | <0.001***            |                                            |                               |
| Baseline NMPP (< median = 1.54, ≥ median = 1.54)                                                                            |     |                          |                                        |                 |                      | 0.043*                                     | <0.001***                     |
| Placebo                                                                                                                     | 627 | -13.67 (0.748)           |                                        |                 |                      |                                            |                               |
| Elagolix 150 mg QD                                                                                                          | 418 | -17.88 (0.917)           | -4.21 (1.18)                           | (-6.53, -1.89)  | <0.001***            |                                            |                               |
| Elagolix 200 mg BID                                                                                                         | 396 | -21.08 (0.944)           | -7.40 (1.20)                           | (-9.77, -5.04)  | <0.001***            |                                            |                               |
| Baseline dyspareunia (< median = 1.40, ≥ median = 1.40)                                                                     |     |                          |                                        |                 |                      | 0.286                                      | 0.029*                        |
| Placebo                                                                                                                     | 511 | -14.14 (0.841)           |                                        |                 |                      |                                            |                               |
| Elagolix 150 mg QD                                                                                                          | 347 | -18.02 (1.020)           | -3.89 (1.32)                           | (-6.48, -1.29)  | 0.003**              |                                            |                               |

|                                                                           |     |                |              |                 |           |        |         |
|---------------------------------------------------------------------------|-----|----------------|--------------|-----------------|-----------|--------|---------|
| Elagolix 200 mg BID                                                       | 319 | -21.87 (1.064) | -7.73 (1.36) | (-10.39, -5.07) | <0.001*** |        |         |
| Time since endometriosis diagnosis (< 2 years, 2 to < 5 years, ≥ 5 years) |     |                |              |                 |           | 0.782  | 0.086   |
| Placebo                                                                   | 627 | -13.67 (0.754) |              |                 |           |        |         |
| Elagolix 150 mg QD                                                        | 418 | -17.97 (0.935) | -4.30 (1.20) | (-6.66, -1.95)  | <0.001*** |        |         |
| Elagolix 200 mg BID                                                       | 395 | -21.05 (0.951) | -7.39 (1.21) | (-9.77, -5.01)  | <0.001*** |        |         |
| Baseline analgesic use (none, opioid, NSAID, both)                        |     |                |              |                 |           | 0.607  | 0.008** |
| Placebo                                                                   | 627 | -13.81 (0.921) |              |                 |           |        |         |
| Elagolix 150 mg QD                                                        | 418 | -17.61 (1.008) | -3.80 (1.37) | (-6.47, -1.12)  | 0.005**   |        |         |
| Elagolix 200 mg BID                                                       | 396 | -21.77 (1.159) | -7.96 (1.48) | (-10.86, -5.06) | <0.001*** |        |         |
| Previous GnRH therapy (yes, no)                                           |     |                |              |                 |           | 0.045* | 0.262   |
| Placebo                                                                   | 627 | -12.56 (0.862) |              |                 |           |        |         |
| Elagolix 150 mg QD                                                        | 418 | -17.39 (1.043) | -4.83 (1.35) | (-7.49, -2.18)  | <0.001*** |        |         |
| Elagolix 200 mg BID                                                       | 396 | -21.65 (1.053) | -9.09 (1.36) | (-11.76, -6.42) | <0.001*** |        |         |
| Entered washout (yes, no)                                                 |     |                |              |                 |           | 0.522  | 0.552   |
| Placebo                                                                   | 627 | -13.89 (0.852) |              |                 |           |        |         |
| Elagolix 150 mg QD                                                        | 418 | -17.45 (1.087) | -3.56 (1.38) | (-6.27, -0.85)  | 0.010**   |        |         |
| Elagolix 200 mg BID                                                       | 396 | -21.74 (1.096) | -7.86 (1.39) | (-10.58, -5.13) | <0.001*** |        |         |
| History of pregnancy at baseline (yes, no)                                |     |                |              |                 |           | 0.179  | 0.043*  |
| Placebo                                                                   | 627 | -13.51 (0.758) |              |                 |           |        |         |
| Elagolix 150 mg QD                                                        | 418 | -17.80 (0.939) | -4.29 (1.21) | (-6.66, -1.92)  | <0.001*** |        |         |
| Elagolix 200 mg BID                                                       | 396 | -20.85 (0.953) | -7.34 (1.22) | (-9.73, -4.95)  | <0.001*** |        |         |

<sup>a</sup>Each dimension for the core and modular questionnaire is calculated on a scale from 0 = best possible health status to 100 = worst possible health status.

<sup>b</sup>*p* value for test of difference between each elagolix dose group and placebo at each postbaseline time point is from an ANCOVA model with treatment as the main effect, baseline value, subgroup, and treatment × subgroup as covariates.

<sup>c</sup>*p* values are obtained from an ANCOVA model: change from baseline = treatment + baseline value + subgroup + treatment × subgroup.

\**p*<0.05. \*\**p*<0.01. \*\*\**p*<0.001.

ANCOVA analysis of covariance; *BID* twice daily; *BMI* body mass index; *GnRH* gonadotropin-releasing hormone; *NMPP* non-menstrual pelvic pain; *NSAID* non-steroidal anti-inflammatory drug; *QD* once daily.



**Supplemental Table 4. Endometriosis Health Profile-30 at month 3 – social support**

| Variable                                                                                                                    | N   | Least squares means (SE) | Difference of least squares means (SE) | 95% CI          | p value <sup>b</sup> | Treatment by subgroup p value <sup>c</sup> | Subgroup p value <sup>c</sup> |
|-----------------------------------------------------------------------------------------------------------------------------|-----|--------------------------|----------------------------------------|-----------------|----------------------|--------------------------------------------|-------------------------------|
| <b>Social Support<sup>a</sup></b>                                                                                           |     |                          |                                        |                 |                      |                                            |                               |
| Age group (< 25 years, 25 to 35 years, > 35 years)                                                                          |     |                          |                                        |                 |                      | 0.100                                      | 0.013*                        |
| Placebo                                                                                                                     | 629 | -12.25 (1.143)           |                                        |                 |                      |                                            |                               |
| Elagolix 150 mg QD                                                                                                          | 422 | -16.62 (1.376)           | -4.37 (1.79)                           | (-7.88, -0.86)  | 0.015*               |                                            |                               |
| Elagolix 200 mg BID                                                                                                         | 406 | -23.73 (1.358)           | -11.48 (1.78)                          | (-14.96, -8.00) | <0.001***            |                                            |                               |
| BMI group (normal = < 25 kg/m <sup>2</sup> , overweight = 25 to ≤ 29.9 kg/m <sup>2</sup> , obese = ≥ 30 kg/m <sup>2</sup> ) |     |                          |                                        |                 |                      | 0.766                                      | 0.619                         |
| Placebo                                                                                                                     | 627 | -12.63 (0.947)           |                                        |                 |                      |                                            |                               |
| Elagolix 150 mg QD                                                                                                          | 421 | -17.96 (1.147)           | -5.33 (1.49)                           | (-8.25, -2.41)  | <0.001***            |                                            |                               |
| Elagolix 200 mg BID                                                                                                         | 403 | -24.11 (1.191)           | -11.48 (1.52)                          | (-14.46, -8.49) | <0.001***            |                                            |                               |
| Race group (White, Black, other)                                                                                            |     |                          |                                        |                 |                      | 0.294                                      | 0.978                         |
| Placebo                                                                                                                     | 629 | -11.73 (2.056)           |                                        |                 |                      |                                            |                               |
| Elagolix 150 mg QD                                                                                                          | 422 | -20.20 (2.616)           | -8.47 (3.33)                           | (-14.99, -1.94) | 0.011*               |                                            |                               |
| Elagolix 200 mg BID                                                                                                         | 406 | -23.18 (2.774)           | -11.44 (3.45)                          | (-18.21, -4.67) | <0.001***            |                                            |                               |
| Ethnic group (Hispanic or Latino, other)                                                                                    |     |                          |                                        |                 |                      | 0.085                                      | 0.030*                        |
| Placebo                                                                                                                     | 629 | -12.23 (1.312)           |                                        |                 |                      |                                            |                               |
| Elagolix 150 mg QD                                                                                                          | 422 | -14.72 (1.595)           | -2.49 (2.07)                           | (-6.54, 1.56)   | 0.229                |                                            |                               |
| Elagolix 200 mg BID                                                                                                         | 406 | -23.77 (1.600)           | -11.54 (2.07)                          | (-15.60, -7.48) | <0.001***            |                                            |                               |
| Baseline dysmenorrhea (< median = 2.17, ≥ median = 2.17)                                                                    |     |                          |                                        |                 |                      | 0.002**                                    | <0.001***                     |
| Placebo                                                                                                                     | 629 | -12.57 (0.926)           |                                        |                 |                      |                                            |                               |
| Elagolix 150 mg QD                                                                                                          | 422 | -18.13 (1.130)           | -5.56 (1.46)                           | (-8.43, -2.70)  | <0.001***            |                                            |                               |
| Elagolix 200 mg BID                                                                                                         | 406 | -24.11 (1.153)           | -11.54 (1.48)                          | (-14.45, -8.64) | <0.001***            |                                            |                               |
| Baseline NMPP (< median = 1.54, ≥ median = 1.54)                                                                            |     |                          |                                        |                 |                      | 0.010**                                    | <0.001***                     |
| Placebo                                                                                                                     | 629 | -12.55 (0.923)           |                                        |                 |                      |                                            |                               |
| Elagolix 150 mg QD                                                                                                          | 422 | -18.26 (1.127)           | -5.71 (1.46)                           | (-8.57, -2.85)  | <0.001***            |                                            |                               |
| Elagolix 200 mg BID                                                                                                         | 406 | -23.98 (1.153)           | -11.43 (1.48)                          | (-14.33, -8.54) | <0.001***            |                                            |                               |
| Baseline dyspareunia (< median = 1.40, ≥ median = 1.40)                                                                     |     |                          |                                        |                 |                      | 0.273                                      | 0.006**                       |
| Placebo                                                                                                                     | 515 | -12.80 (1.037)           |                                        |                 |                      |                                            |                               |
| Elagolix 150 mg QD                                                                                                          | 350 | -17.62 (1.258)           | -4.81 (1.63)                           | (-8.01, -1.62)  | 0.003**              |                                            |                               |

|                                                                           |     |                |               |                  |           |         |           |
|---------------------------------------------------------------------------|-----|----------------|---------------|------------------|-----------|---------|-----------|
| Elagolix 200 mg BID                                                       | 327 | -25.09 (1.302) | -12.29 (1.67) | (-15.56, -9.02)  | <0.001*** |         |           |
| Time since endometriosis diagnosis (< 2 years, 2 to < 5 years, ≥ 5 years) |     |                |               |                  |           | 0.473   | <0.001*** |
| Placebo                                                                   | 629 | -12.55 (0.931) |               |                  |           |         |           |
| Elagolix 150 mg QD                                                        | 422 | -18.53 (1.152) | -5.98 (1.48)  | (-8.89, -3.08)   | <0.001*** |         |           |
| Elagolix 200 mg BID                                                       | 405 | -23.94 (1.162) | -11.40 (1.49) | (-14.32, -8.47)  | <0.001*** |         |           |
| Baseline analgesic use (none, opioids, NSAID, both)                       |     |                |               |                  |           | 0.219   | 0.012*    |
| Placebo                                                                   | 629 | -12.79 (1.142) |               |                  |           |         |           |
| Elagolix 150 mg QD                                                        | 422 | -17.57 (1.249) | -4.78 (1.69)  | (-8.10, -1.46)   | 0.005**   |         |           |
| Elagolix 200 mg BID                                                       | 406 | -24.84 (1.429) | -12.05 (1.83) | (-15.64, -8.47)  | <0.001*** |         |           |
| Previous GnRH therapy (yes, no)                                           |     |                |               |                  |           | 0.021*  | 0.145     |
| Placebo                                                                   | 629 | -10.86 (1.068) |               |                  |           |         |           |
| Elagolix 150 mg QD                                                        | 422 | -17.57 (1.290) | -6.71 (1.67)  | (-9.99, -3.42)   | <0.001*** |         |           |
| Elagolix 200 mg BID                                                       | 406 | -24.69 (1.304) | -13.83 (1.69) | (-17.13, -10.52) | <0.001*** |         |           |
| Entered washout (yes, no)                                                 |     |                |               |                  |           | 0.847   | 0.481     |
| Placebo                                                                   | 629 | -12.83 (1.061) |               |                  |           |         |           |
| Elagolix 150 mg QD                                                        | 422 | -17.96 (1.345) | -5.13 (1.71)  | (-8.49, -1.77)   | 0.003**   |         |           |
| Elagolix 200 mg BID                                                       | 406 | -24.65 (1.345) | -11.81 (1.71) | (-15.18, -8.45)  | <0.001*** |         |           |
| History of pregnancy at baseline (yes, no)                                |     |                |               |                  |           | 0.005** | 0.109     |
| Placebo                                                                   | 629 | -12.58 (0.941) |               |                  |           |         |           |
| Elagolix 150 mg QD                                                        | 422 | -18.14 (1.160) | -5.55 (1.49)  | (-8.48, -2.62)   | <0.001*** |         |           |
| Elagolix 200 mg BID                                                       | 406 | -23.61 (1.168) | -11.03 (1.50) | (-13.97, -8.09)  | <0.001*** |         |           |

<sup>a</sup>Each dimension for the core and modular questionnaire is calculated on a scale from 0 = best possible health status to 100 = worst possible health status.

<sup>b</sup>*p* value for test of difference between each elagolix dose group and placebo at each post-baseline time point is from an ANCOVA model with treatment as the main effect, baseline value, subgroup, and treatment × subgroup as covariates.

<sup>c</sup>*p* values are obtained from an ANCOVA model: change from baseline = treatment + baseline value + subgroup + treatment × subgroup.

\**p*<0.05. \*\**p*<0.01. \*\*\**p*<0.001.

ANCOVA analysis of covariance; *BID* twice daily; *BMI* body mass index; *GnRH* gonadotropin-releasing hormone; *NMPP* non-menstrual pelvic pain; *NSAID* non-steroidal anti-inflammatory drug; *QD* once daily.

**Supplemental Table 5. Endometriosis Health Profile-30 at Month 3 – self-image**

| Variable                                                                                                                    | N   | Least squares means (SE) | Difference of least squares means (SE) | 95% CI          | p value <sup>b</sup> | Treatment by subgroup p value <sup>c</sup> | Subgroup p value <sup>c</sup> |
|-----------------------------------------------------------------------------------------------------------------------------|-----|--------------------------|----------------------------------------|-----------------|----------------------|--------------------------------------------|-------------------------------|
| <b>Self-Image<sup>a</sup></b>                                                                                               |     |                          |                                        |                 |                      |                                            |                               |
| Age group (< 25 years, 25 to 35 years, > 35 years)                                                                          |     |                          |                                        |                 |                      | 0.244                                      | 0.032*                        |
| Placebo                                                                                                                     | 627 | -10.22 (1.130)           |                                        |                 |                      |                                            |                               |
| Elagolix 150 mg QD                                                                                                          | 417 | -14.82 (1.364)           | -4.59 (1.77)                           | (-8.07, -1.12)  | 0.010**              |                                            |                               |
| Elagolix 200 mg BID                                                                                                         | 405 | -20.37 (1.348)           | -10.15 (1.76)                          | (-13.60, -6.70) | <0.001***            |                                            |                               |
| BMI group (normal = < 25 kg/m <sup>2</sup> , overweight = 25 to ≤ 29.9 kg/m <sup>2</sup> , obese = ≥ 30 kg/m <sup>2</sup> ) |     |                          |                                        |                 |                      | 0.111                                      | 0.209                         |
| Placebo                                                                                                                     | 625 | -10.88 (0.933)           |                                        |                 |                      |                                            |                               |
| Elagolix 150 mg QD                                                                                                          | 416 | -16.36 (1.135)           | -5.48 (1.47)                           | (-8.36, -2.59)  | <0.001***            |                                            |                               |
| Elagolix 200 mg BID                                                                                                         | 403 | -21.32 (1.170)           | -10.44 (1.50)                          | (-13.38, -7.51) | <0.001***            |                                            |                               |
| Race group (White, Black, other)                                                                                            |     |                          |                                        |                 |                      | 0.783                                      | 0.294                         |
| Placebo                                                                                                                     | 627 | -11.65 (2.027)           |                                        |                 |                      |                                            |                               |
| Elagolix 150 mg QD                                                                                                          | 417 | -17.23 (2.607)           | -5.58 (3.30)                           | (-12.05, 0.90)  | 0.091                |                                            |                               |
| Elagolix 200 mg BID                                                                                                         | 405 | -23.11 (2.734)           | -11.46 (3.40)                          | (-18.13, -4.78) | <0.001***            |                                            |                               |
| Ethnic group (Hispanic or Latino, other)                                                                                    |     |                          |                                        |                 |                      | 0.786                                      | 0.188                         |
| Placebo                                                                                                                     | 627 | -10.89 (1.297)           |                                        |                 |                      |                                            |                               |
| Elagolix 150 mg QD                                                                                                          | 417 | -15.31 (1.588)           | -4.42 (2.05)                           | (-8.44, -0.39)  | 0.031*               |                                            |                               |
| Elagolix 200 mg BID                                                                                                         | 405 | -20.20 (1.582)           | -9.31 (2.05)                           | (-13.32, -5.30) | <0.001***            |                                            |                               |
| Baseline dysmenorrhea (< median = 2.17, ≥ median = 2.17)                                                                    |     |                          |                                        |                 |                      | 0.144                                      | <0.001***                     |
| Placebo                                                                                                                     | 627 | -11.16 (0.917)           |                                        |                 |                      |                                            |                               |
| Elagolix 150 mg QD                                                                                                          | 417 | -16.58 (1.124)           | -5.42 (1.45)                           | (-8.26, -2.57)  | <0.001***            |                                            |                               |
| Elagolix 200 mg BID                                                                                                         | 405 | -21.00 (1.142)           | -9.84 (1.46)                           | (-12.71, -6.97) | <0.001***            |                                            |                               |
| Baseline NMPP (< median = 1.54, ≥ median = 1.54)                                                                            |     |                          |                                        |                 |                      | 0.473                                      | <0.001***                     |
| Placebo                                                                                                                     | 627 | -11.15 (0.919)           |                                        |                 |                      |                                            |                               |
| Elagolix 150 mg QD                                                                                                          | 417 | -16.64 (1.127)           | -5.49 (1.45)                           | (-8.35, -2.64)  | <0.001***            |                                            |                               |
| Elagolix 200 mg BID                                                                                                         | 405 | -20.94 (1.147)           | -9.80 (1.47)                           | (-12.68, -6.91) | <0.001***            |                                            |                               |
| Baseline dyspareunia (< median = 1.40, ≥ median = 1.40)                                                                     |     |                          |                                        |                 |                      | 0.611                                      | 0.040*                        |
| Placebo                                                                                                                     | 513 | -11.80 (1.021)           |                                        |                 |                      |                                            |                               |
| Elagolix 150 mg QD                                                                                                          | 346 | -16.82 (1.244)           | -5.02 (1.61)                           | (-8.18, -1.87)  | 0.002**              |                                            |                               |

|                                                                         |     |                |               |                 |           |       |         |
|-------------------------------------------------------------------------|-----|----------------|---------------|-----------------|-----------|-------|---------|
| Elagolix 200 mg BID                                                     | 326 | -22.53 (1.281) | -10.74 (1.64) | (-13.95, -7.52) | <0.001*** |       |         |
| Time since endometriosis diagnosis (< 2 years, 2 to 5 years, ≥ 5 years) |     |                |               |                 |           | 0.604 | 0.002** |
| Placebo                                                                 | 627 | -11.13 (0.921) |               |                 |           |       |         |
| Elagolix 150 mg QD                                                      | 417 | -16.98 (1.144) | -5.86 (1.47)  | (-8.74, -2.97)  | <0.001*** |       |         |
| Elagolix 200 mg BID                                                     | 404 | -21.09 (1.149) | -9.96 (1.47)  | (-12.85, -7.07) | <0.001*** |       |         |
| Baseline analgesic use (none, opioid, NSAID, both)                      |     |                |               |                 |           | 0.088 | 0.183   |
| Placebo                                                                 | 627 | -10.17 (1.130) |               |                 |           |       |         |
| Elagolix 150 mg QD                                                      | 417 | -16.28 (1.247) | -6.11 (1.68)  | (-9.41, -2.81)  | <0.001*** |       |         |
| Elagolix 200 mg BID                                                     | 405 | -21.87 (1.412) | -11.70 (1.81) | (-15.24, -8.15) | <0.001*** |       |         |
| Previous GnRH therapy (yes, no)                                         |     |                |               |                 |           | 0.604 | 0.978   |
| Placebo                                                                 | 627 | -10.77 (1.064) |               |                 |           |       |         |
| Elagolix 150 mg QD                                                      | 417 | -16.46 (1.291) | -5.69 (1.67)  | (-8.97, -2.41)  | <0.001*** |       |         |
| Elagolix 200 mg BID                                                     | 405 | -21.49 (1.290) | -10.72 (1.67) | (-14.00, -7.44) | <0.001*** |       |         |
| Entered washout (yes, no)                                               |     |                |               |                 |           | 0.157 | 0.291   |
| Placebo                                                                 | 627 | -11.18 (1.042) |               |                 |           |       |         |
| Elagolix 150 mg QD                                                      | 417 | -15.05 (1.337) | -3.88 (1.70)  | (-7.20, -0.55)  | 0.022*    |       |         |
| Elagolix 200 mg BID                                                     | 405 | -21.32 (1.324) | -10.15 (1.68) | (-13.45, -6.84) | <0.001*** |       |         |
| History of pregnancy at baseline (yes, no)                              |     |                |               |                 |           | 0.200 | 0.173   |
| Placebo                                                                 | 627 | -11.13 (0.931) |               |                 |           |       |         |
| Elagolix 150 mg QD                                                      | 417 | -16.57 (1.152) | -5.45 (1.48)  | (-8.35, -2.54)  | <0.001*** |       |         |
| Elagolix 200 mg BID                                                     | 405 | -20.75 (1.156) | -9.62 (1.48)  | (-12.54, -6.71) | <0.001*** |       |         |

<sup>a</sup>Each dimension for the core and modular questionnaire is calculated on a scale from 0 = best possible health status to 100 = worst possible health status.

<sup>b</sup>*p* value for test of difference between each elagolix dose group and placebo at each post-baseline time point is from an ANCOVA model with treatment as the main effect, baseline value, subgroup, and treatment × subgroup as covariates.

<sup>c</sup>*p* values are obtained from an ANCOVA model: change from baseline = treatment + baseline value + subgroup + treatment × subgroup.

\**p*<0.05. \*\**p*<0.01. \*\*\**p*<0.001.

ANCOVA analysis of covariance; *BID* twice daily; *BMI* body mass index; *GnRH* gonadotropin-releasing hormone; *NMPP* non-menstrual pelvic pain; *NSAID* non-steroidal anti-inflammatory drug; *QD* once daily.

**Supplemental Table 6. Endometriosis Health Profile-30 at month 3 – sexual intercourse**

| Variable                                                                                                                    | N   | Least squares means (SE) | Difference of least squares means (SE) | 95% CI           | p value <sup>b</sup> | Treatment by subgroup p value <sup>c</sup> | Subgroup p value <sup>c</sup> |
|-----------------------------------------------------------------------------------------------------------------------------|-----|--------------------------|----------------------------------------|------------------|----------------------|--------------------------------------------|-------------------------------|
| <b>Sexual Intercourse<sup>a</sup></b>                                                                                       |     |                          |                                        |                  |                      |                                            |                               |
| Age group (< 25 years, 25 to 35 years, > 35 years)                                                                          |     |                          |                                        |                  |                      | 0.916                                      | 0.005**                       |
| Placebo                                                                                                                     | 449 | -13.43 (1.329)           |                                        |                  |                      |                                            |                               |
| Elagolix 150 mg QD                                                                                                          | 306 | -17.24 (1.585)           | -3.80 (2.07)                           | (-7.86, 0.25)    | 0.066                |                                            |                               |
| Elagolix 200 mg BID                                                                                                         | 279 | -25.91 (1.610)           | -12.47 (2.09)                          | (-16.57, -8.38)  | <0.001***            |                                            |                               |
| BMI group (normal = < 25 kg/m <sup>2</sup> , overweight = 25 to ≤ 29.9 kg/m <sup>2</sup> , obese = ≥ 30 kg/m <sup>2</sup> ) |     |                          |                                        |                  |                      | 0.359                                      | 0.427                         |
| Placebo                                                                                                                     | 448 | -13.48 (1.092)           |                                        |                  |                      |                                            |                               |
| Elagolix 150 mg QD                                                                                                          | 305 | -17.39 (1.328)           | -3.91 (1.72)                           | (-7.28, -0.53)   | 0.023*               |                                            |                               |
| Elagolix 200 mg BID                                                                                                         | 277 | -26.29 (1.413)           | -12.81 (1.79)                          | (-16.31, -9.30)  | <0.001***            |                                            |                               |
| Race group (White, Black, other)                                                                                            |     |                          |                                        |                  |                      | 0.005**                                    | 0.893                         |
| Placebo                                                                                                                     | 449 | -10.29 (2.811)           |                                        |                  |                      |                                            |                               |
| Elagolix 150 mg QD                                                                                                          | 306 | -16.23 (3.439)           | -5.95 (4.44)                           | (-14.66, 2.77)   | 0.181                |                                            |                               |
| Elagolix 200 mg BID                                                                                                         | 279 | -32.03 (3.013)           | -21.74 (4.12)                          | (-29.82, -13.66) | <0.001***            |                                            |                               |
| Ethnic group (Hispanic or Latino, other)                                                                                    |     |                          |                                        |                  |                      | 0.242                                      | 0.909                         |
| Placebo                                                                                                                     | 449 | -13.31 (1.516)           |                                        |                  |                      |                                            |                               |
| Elagolix 150 mg QD                                                                                                          | 306 | -15.65 (1.849)           | -2.34 (2.39)                           | (-7.03, 2.36)    | 0.329                |                                            |                               |
| Elagolix 200 mg BID                                                                                                         | 279 | -27.36 (1.880)           | -14.04 (2.42)                          | (-18.78, -9.30)  | <0.001***            |                                            |                               |
| Baseline dysmenorrhea (< median = 2.17, ≥ median = 2.17)                                                                    |     |                          |                                        |                  |                      | 0.388                                      | 0.089                         |
| Placebo                                                                                                                     | 449 | -13.54 (1.080)           |                                        |                  |                      |                                            |                               |
| Elagolix 150 mg QD                                                                                                          | 306 | -17.34 (1.310)           | -3.80 (1.70)                           | (-7.14, -0.47)   | 0.025*               |                                            |                               |
| Elagolix 200 mg BID                                                                                                         | 279 | -25.81 (1.370)           | -12.27 (1.74)                          | (-15.69, -8.85)  | <0.001***            |                                            |                               |
| Baseline NMPP (< median = 1.54, ≥ median = 1.54)                                                                            |     |                          |                                        |                  |                      | 0.111                                      | 0.160                         |
| Placebo                                                                                                                     | 449 | -13.54 (1.079)           |                                        |                  |                      |                                            |                               |
| Elagolix 150 mg QD                                                                                                          | 306 | -17.42 (1.310)           | -3.88 (1.70)                           | (-7.21, -0.55)   | 0.023*               |                                            |                               |
| Elagolix 200 mg BID                                                                                                         | 279 | -25.77 (1.374)           | -12.23 (1.75)                          | (-15.66, -8.80)  | <0.001***            |                                            |                               |
| Baseline dyspareunia (< median = 1.40, ≥ median = 1.40)                                                                     |     |                          |                                        |                  |                      | 0.649                                      | 0.007**                       |
| Placebo                                                                                                                     | 437 | -13.65 (1.092)           |                                        |                  |                      |                                            |                               |
| Elagolix 150 mg QD                                                                                                          | 296 | -17.45 (1.327)           | -3.81 (1.72)                           | (-7.18, -0.44)   | 0.027*               |                                            |                               |

|                                                                           |     |                |               |                  |           |         |         |
|---------------------------------------------------------------------------|-----|----------------|---------------|------------------|-----------|---------|---------|
| Elagolix 200 mg BID                                                       | 271 | -26.08 (1.387) | -12.43 (1.76) | (-15.90, -8.97)  | <0.001*** |         |         |
| Time since endometriosis diagnosis (< 2 years, 2 to < 5 years, ≥ 5 years) |     |                |               |                  |           | 0.213   | 0.668   |
| Placebo                                                                   | 449 | -13.61 (1.081) |               |                  |           |         |         |
| Elagolix 150 mg QD                                                        | 306 | -17.62 (1.337) | -4.02 (1.72)  | (-7.39, -0.64)   | 0.020*    |         |         |
| Elagolix 200 mg BID                                                       | 279 | -25.83 (1.373) | -12.22 (1.75) | (-15.65, -8.79)  | <0.001*** |         |         |
| Baseline analgesic use (none, opioids, NSAID, both)                       |     |                |               |                  |           | 0.016*  | 0.180   |
| Placebo                                                                   | 449 | -13.35 (1.305) |               |                  |           |         |         |
| Elagolix 150 mg QD                                                        | 306 | -16.66 (1.428) | -3.31 (1.93)  | (-7.10, 0.49)    | 0.088     |         |         |
| Elagolix 200 mg BID                                                       | 279 | -28.00 (1.861) | -14.64 (2.27) | (-19.11, -10.18) | <0.001*** |         |         |
| Previous GnRH therapy (yes, no)                                           |     |                |               |                  |           | 0.074   | 0.232   |
| Placebo                                                                   | 449 | -13.02 (1.236) |               |                  |           |         |         |
| Elagolix 150 mg QD                                                        | 306 | -15.52 (1.498) | -2.50 (1.94)  | (-6.31, 1.31)    | 0.198     |         |         |
| Elagolix 200 mg BID                                                       | 279 | -26.64 (1.602) | -13.63 (2.02) | (-17.59, -9.66)  | <0.001*** |         |         |
| Entered washout (yes, no)                                                 |     |                |               |                  |           | 0.436   | 0.677   |
| Placebo                                                                   | 449 | -13.13 (1.235) |               |                  |           |         |         |
| Elagolix 150 mg QD                                                        | 306 | -17.30 (1.559) | -4.17 (1.99)  | (-8.07, -0.27)   | 0.036*    |         |         |
| Elagolix 200 mg BID                                                       | 279 | -26.81 (1.631) | -13.68 (2.05) | (-17.70, -9.67)  | <0.001*** |         |         |
| History of pregnancy at baseline (yes, no)                                |     |                |               |                  |           | 0.010** | 0.006** |
| Placebo                                                                   | 449 | -13.63 (1.119) |               |                  |           |         |         |
| Elagolix 150 mg QD                                                        | 306 | -16.86 (1.346) | -3.22 (1.75)  | (-6.66, 0.21)    | 0.066     |         |         |
| Elagolix 200 mg BID                                                       | 279 | -24.59 (1.407) | -10.95 (1.80) | (-14.48, -7.43)  | <0.001*** |         |         |

<sup>a</sup>Each dimension for the core and modular questionnaire is calculated on a scale from 0 = best possible health status to 100 = worst possible health status.

<sup>b</sup>*p* value for test of difference between each elagolix dose group and placebo at each post-baseline time point is from an ANCOVA model with treatment as the main effect, baseline value, subgroup, and treatment × subgroup as covariates.

<sup>c</sup>*p* values are obtained from an ANCOVA model: change from baseline = treatment + baseline value + subgroup + treatment × subgroup.

\**p*<0.05. \*\**p*<0.01. \*\*\**p*<0.001.

ANCOVA analysis of covariance; *BID* twice daily; *BMI* body mass index; *GnRH* gonadotropin-releasing hormone; *NMPP* non-menstrual pelvic pain; *NSAID* non-steroidal anti-inflammatory drug; *QD* once daily.

Supplemental Table 7. Adverse events from integrated Elaris EM-I and Elaris EM-II by selected subgroup<sup>a</sup>

| Variable                      | Any AE   |               |                | Any serious AE |               |                | Any severe AE |               |                | Any AE leading to discontinuation |               |                |              |          |              |
|-------------------------------|----------|---------------|----------------|----------------|---------------|----------------|---------------|---------------|----------------|-----------------------------------|---------------|----------------|--------------|----------|--------------|
|                               | Placebo  | 150 mg ELA QD | 200 mg ELA BID | Placebo        | 150 mg ELA QD | 200 mg ELA BID | Placebo       | 150 mg ELA QD | 200 mg ELA BID | Placebo                           | 150 mg ELA QD | 200 mg ELA BID |              |          |              |
|                               | <i>N</i> | <i>N</i>      | <i>N</i>       |                |               |                |               |               |                |                                   |               |                |              |          |              |
| Age (years)                   |          |               |                |                |               |                |               |               |                |                                   |               |                |              |          |              |
| < 25                          | 95       | 67<br>(70.5)  | 58             | 42<br>(72.4)   | 66            | 57<br>(86.4)   | 5 (5.3)       | 2 (3.4)       | 1 (1.5)        | 8 (8.4)                           | 4 (6.9)       | 12<br>(18.2)   | 3 (3.2)      | 2 (3.4)  | 7 (10.6)     |
| 25–29                         | 164      | 125<br>(76.2) | 104            | 88<br>(84.6)   | 106           | 85<br>(80.2)   | 6 (3.7)       | 3 (2.9)       | 4 (3.8)        | 23<br>(14.0)                      | 13<br>(12.5)  | 15<br>(14.2)   | 16 (9.8)     | 4 (3.8)  | 8 (7.5)      |
| 30–34                         | 212      | 147<br>(69.3) | 153            | 120<br>(78.4)  | 140           | 117<br>(83.6)  | 5 (2.4)       | 5 (3.3)       | 4 (2.9)        | 29<br>(13.7)                      | 19<br>(12.4)  | 16<br>(11.4)   | 9 (4.2)      | 14 (9.2) | 12 (8.6)     |
| 35–39                         | 143      | 112<br>(78.3) | 91             | 74<br>(81.3)   | 86            | 73<br>(84.9)   | 3 (2.1)       | 1 (1.1)       | 2 (2.3)        | 16<br>(11.2)                      | 8 (8.8)       | 10<br>(11.6)   | 4 (2.8)      | 4 (4.4)  | 10<br>(11.6) |
| ≥ 40                          | 120      | 86<br>(71.7)  | 69             | 56<br>(81.2)   | 79            | 67<br>(84.8)   | 5 (4.2)       | 3 (4.3)       | 1 (1.3)        | 12<br>(10.0)                      | 5 (7.2)       | 11<br>(13.9)   | 12<br>(10.0) | 2 (2.9)  | 9 (11.4)     |
| Time Since Diagnosis (months) |          |               |                |                |               |                |               |               |                |                                   |               |                |              |          |              |
| < 48                          | 449      | 320<br>(71.3) | 307            | 240<br>(78.2)  | 285           | 234<br>(82.1)  | 17 (3.8)      | 5 (1.6)       | 6 (2.1)        | 52<br>(11.6)                      | 32<br>(10.4)  | 39<br>(13.7)   | 27 (6.0)     | 15 (4.9) | 31<br>(10.9) |
| ≥ 48                          | 285      | 217<br>(76.1) | 168            | 140<br>(83.3)  | 191           | 164<br>(85.9)  | 7 (2.5)       | 9 (5.4)       | 6 (3.1)        | 36<br>(12.6)                      | 17<br>(10.1)  | 24<br>(12.6)   | 17 (6.0)     | 11 (6.5) | 15 (7.9)     |
| Geographic Region             |          |               |                |                |               |                |               |               |                |                                   |               |                |              |          |              |
| US                            | 548      | 397<br>(72.4) | 355            | 285<br>(80.3)  | 358           | 293<br>(81.8)  | 16 (2.9)      | 7 (2.0)       | 9 (2.5)        | 70<br>(12.8)                      | 36<br>(10.1)  | 50<br>(14.0)   | 33 (6.0)     | 22 (6.2) | 33 (9.2)     |
| Non-US                        | 186      | 140<br>(75.3) | 120            | 95<br>(79.2)   | 119           | 106<br>(89.1)  | 8 (4.3)       | 7 (5.8)       | 3 (2.5)        | 18 (9.7)                          | 13<br>(10.8)  | 14<br>(11.8)   | 11 (5.9)     | 4 (3.3)  | 13<br>(10.9) |
| History of Depression         |          |               |                |                |               |                |               |               |                |                                   |               |                |              |          |              |
| Yes                           | 133      | 17<br>(12.8)  | 88             | 13<br>(14.8)   | 103           | 20<br>(19.4)   | 0 (0)         | 0 (0)         | 0 (0)          | 1 (0.8)                           | 1 (1.1)       | 2 (1.9)        | 1 (0.8)      | 1 (1.1)  | 3 (2.9)      |
| No                            | 601      | 28<br>(4.7)   | 387            | 31<br>(8.0)    | 374           | 39<br>(10.4)   | 0 (0)         | 1 (0.3)       | 0 (0)          | 1 (0.2)                           | 1 (0.3)       | 4 (1.1)        | 4 (0.7)      | 3 (0.8)  | 7 (1.9)      |

<sup>a</sup>Adverse events were coded using the Medical Dictionary for Regulatory Activities, versions 18.0 (Elaris EM-I) and 19.0 (Elaris EM-II). The severity of each AE was rated by the investigator as mild, moderate, or severe. Serious AEs were defined as life-threatening, requiring hospitalization or medical or surgical intervention to prevent a serious outcome, or resulting in persistent disability or death. One death occurred in the subgroup—no history of depression, US based, ≥ 48 months since diagnosis, ≥ 40 years old taking elagolix 150 mg once daily. AE adverse event; BID twice daily; ELA elagolix; QD once daily.

## Supplemental Figure Legends

**Supplemental Fig. 1** Co-primary endpoints at month 3 for integrated Elaris EM-I and II by baseline demographic subgroups. (A) Dysmenorrhea responders. (B) Non-menstrual pelvic pain responders. \* $p < 0.05$ , \*\* $p < 0.01$ , and \*\*\* $p < 0.001$  indicate comparison vs. placebo based on a logistic regression model. *BID* twice daily; *BMI* body mass index; *QD* once daily.

**Supplemental Fig. 2** Co-primary endpoints at month 3 for integrated Elaris EM-I and Elaris EM-II by disease severity subgroups. (A) Dysmenorrhea responders. (B) Non-menstrual pelvic pain (NMPP) responders. \* $p < 0.05$ , \*\* $p < 0.01$ , and \*\*\* $p < 0.001$  indicate comparison vs. placebo based on a logistic regression model. *BID* twice daily; *GnRH* gonadotropin-releasing hormone; *NSAID* non-steroidal anti-inflammatory drug; *QD* once daily.

**Supplemental Fig. 3** Patient Global Impression of Change (PGIC) at month 3 for integrated Elaris EM-I and Elaris EM-II by baseline demographic subgroups. \* $p < 0.05$ . \*\* $p < 0.01$ . \*\*\* $p < 0.001$ . *BID* twice daily; *BMI* body mass index; *QD* once daily.

**Supplemental Fig. 4** Patient Global Impression of Change (PGIC) at month 3 for integrated Elaris EM-I and Elaris EM-II by disease severity subgroups. \* $p < 0.05$ . \*\* $p < 0.01$ . \*\*\* $p < 0.001$ . *BID* twice daily; *GnRH* gonadotropin-releasing hormone; *NMPP* non-menstrual pelvic pain; *QD* once daily.



SUPPLEMENTAL FIGURES

Supplemental Figure 1A

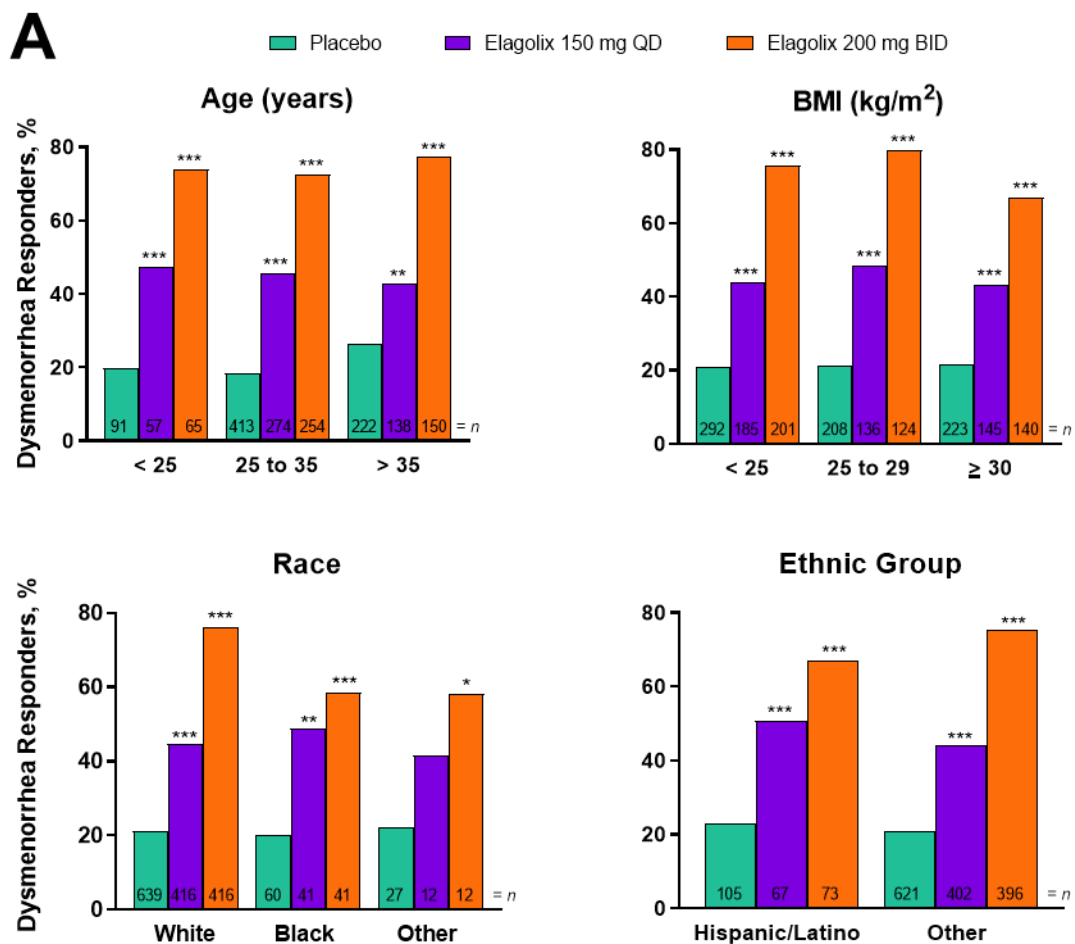

Supplemental Figure 1B

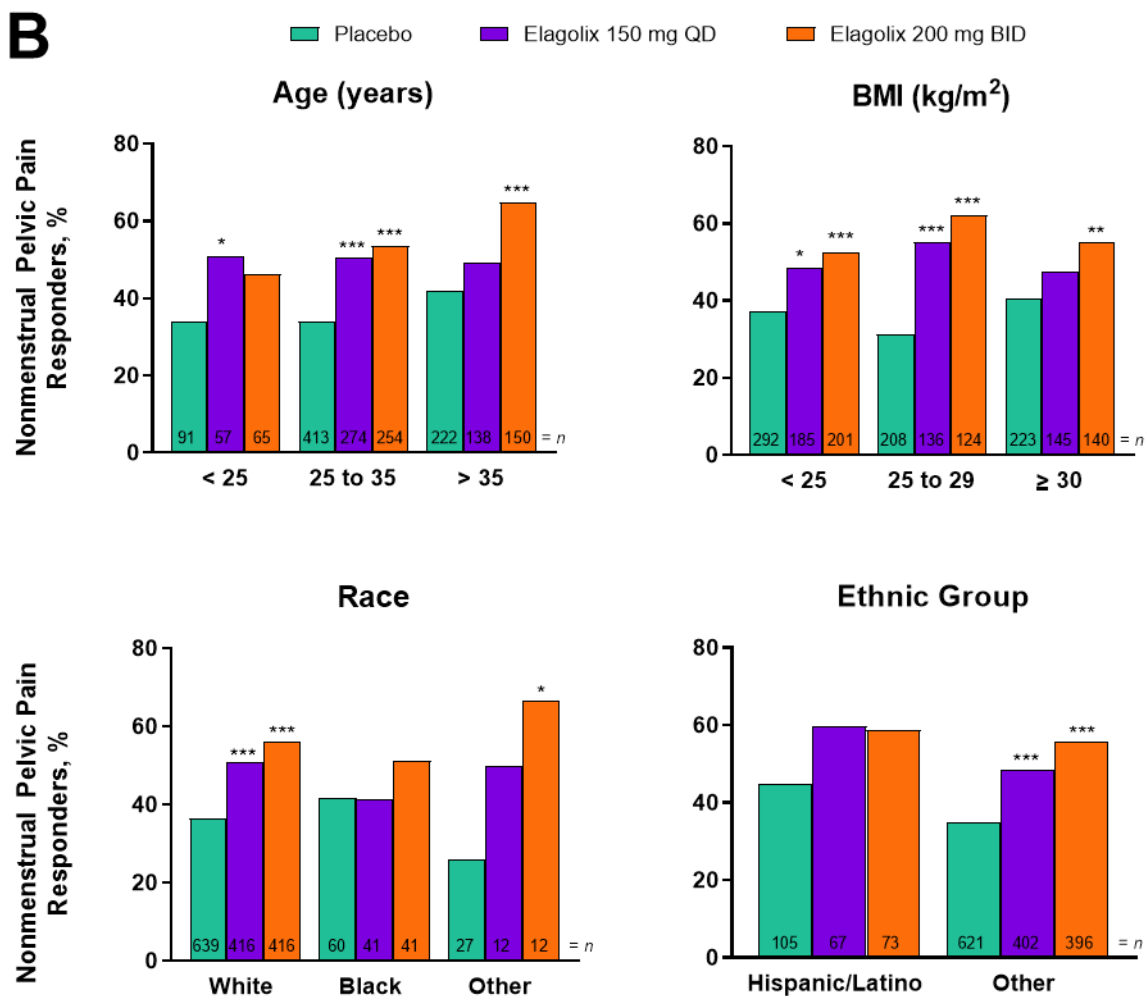

Supplemental Figure 2A

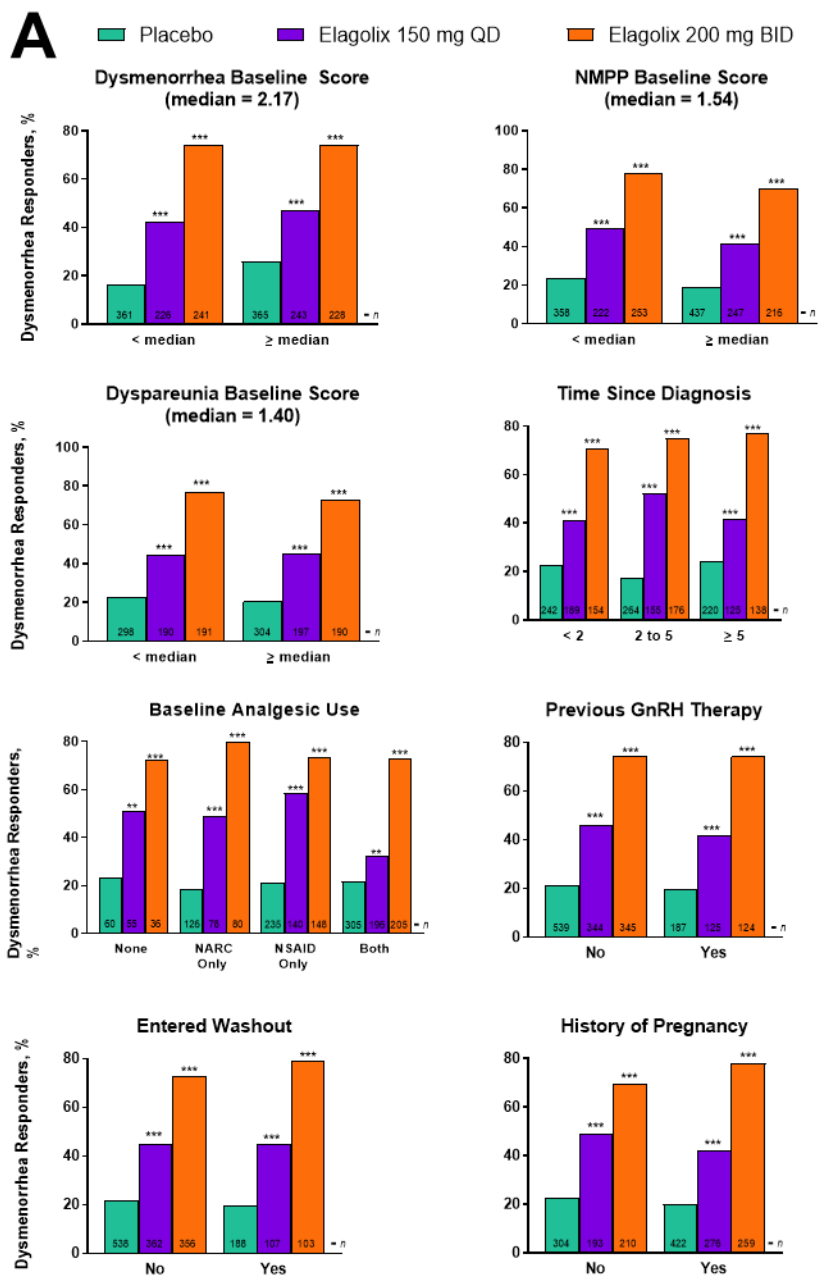

Supplemental Figure 2B

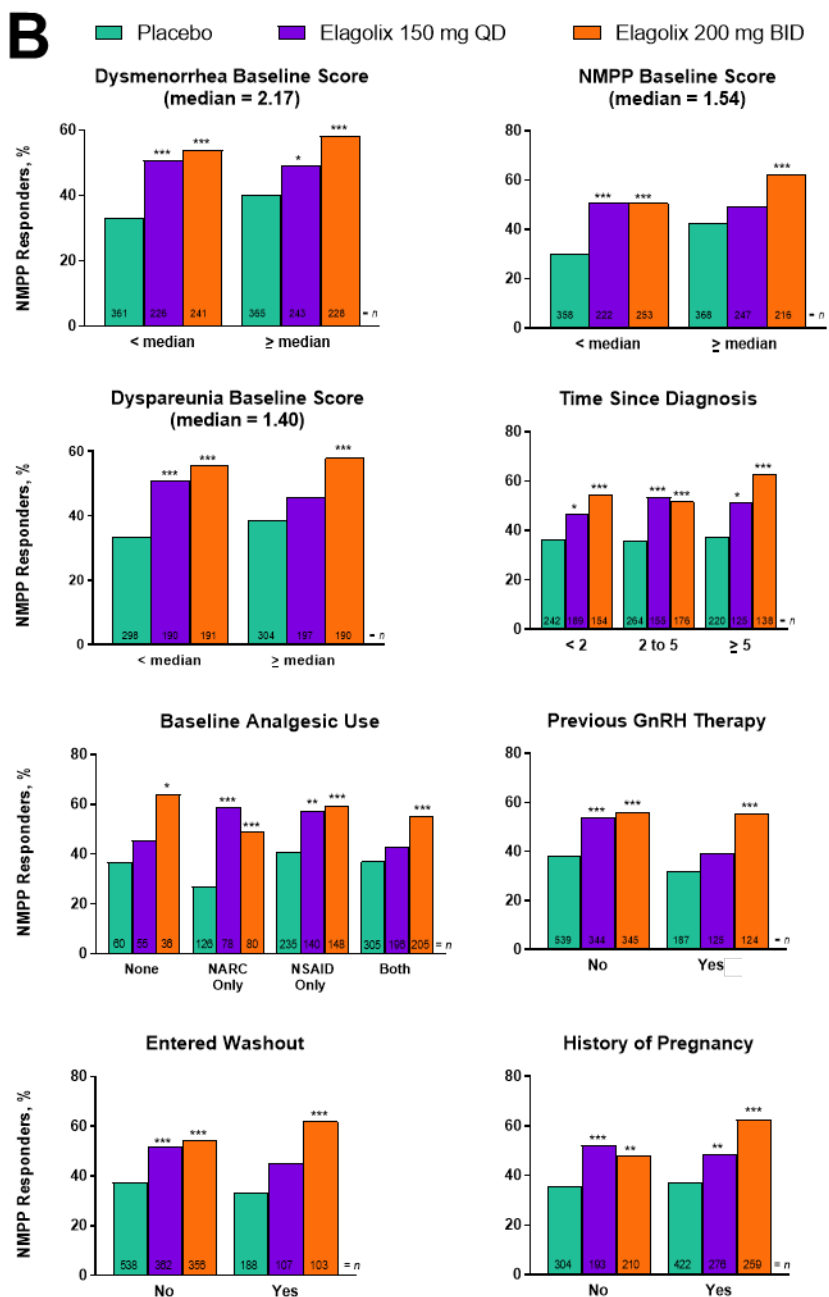

Supplemental Figure 3

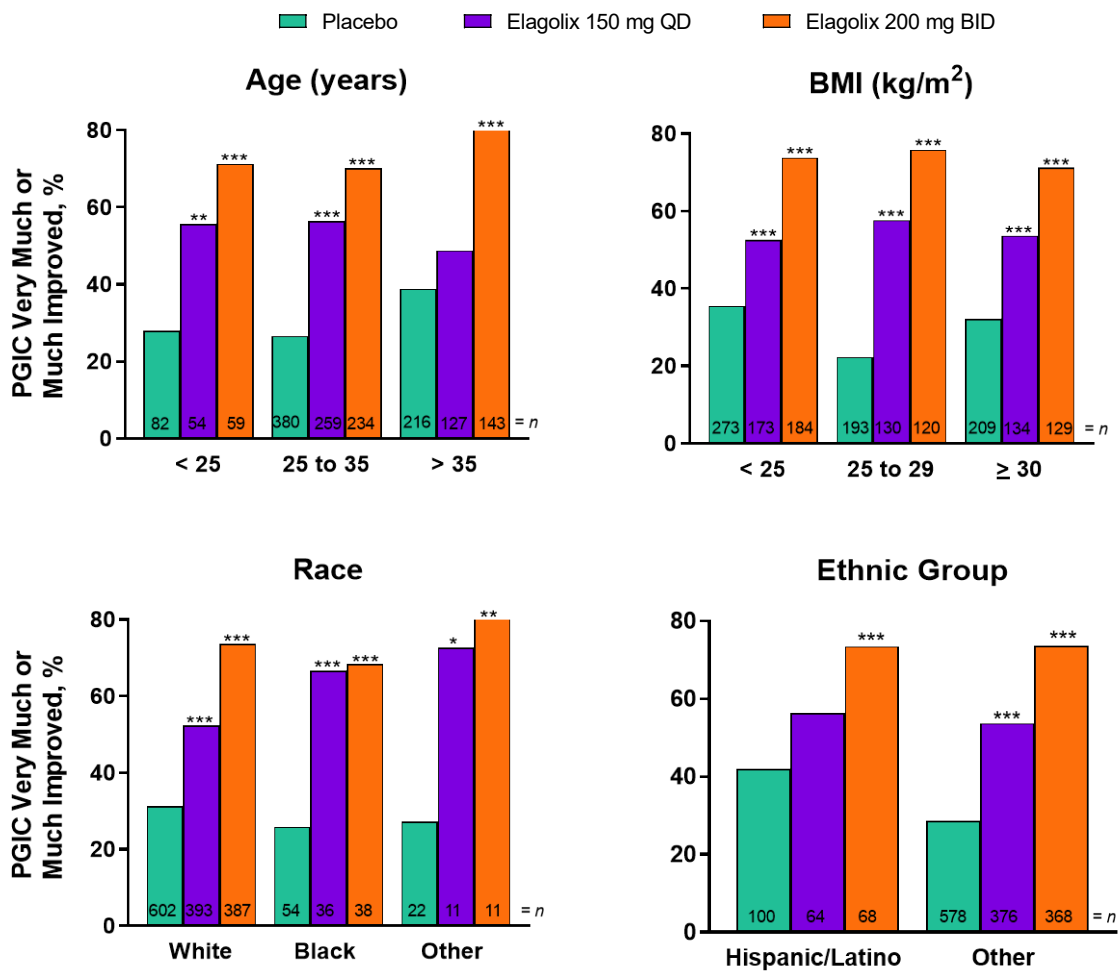

Supplemental Figure 4

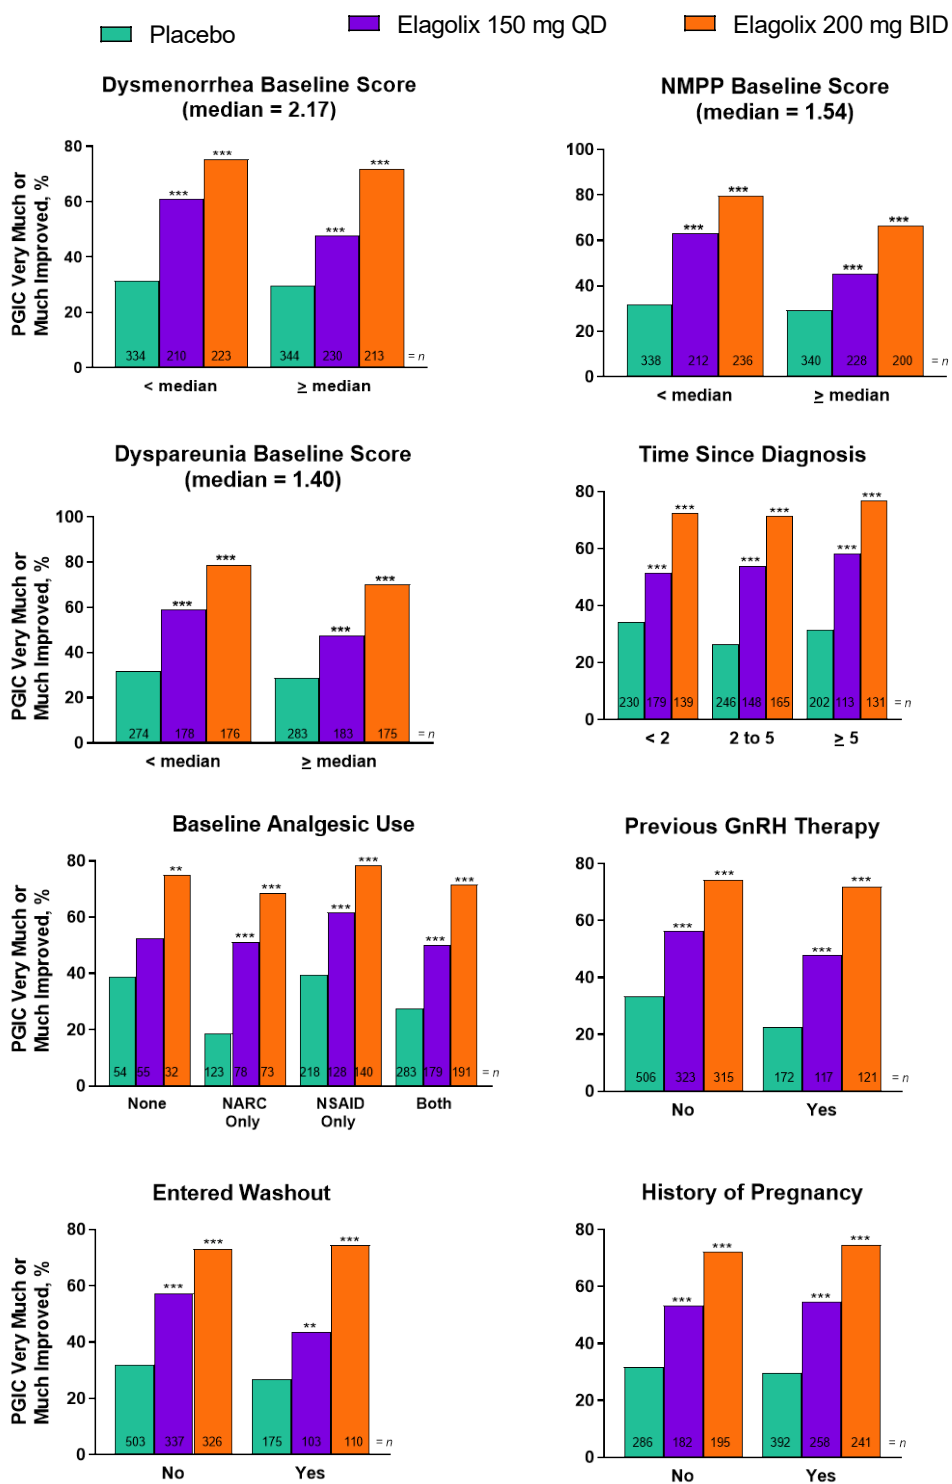

Supplement: 12905_2021_1385_MOESM1_ESM.pdf [file 12905_2021_1385_MOESM1_ESM.pdf]
